# Supplementary material
Source: PubMed Central journal article supplement (PMC3938553)

$IFN-\alpha$ 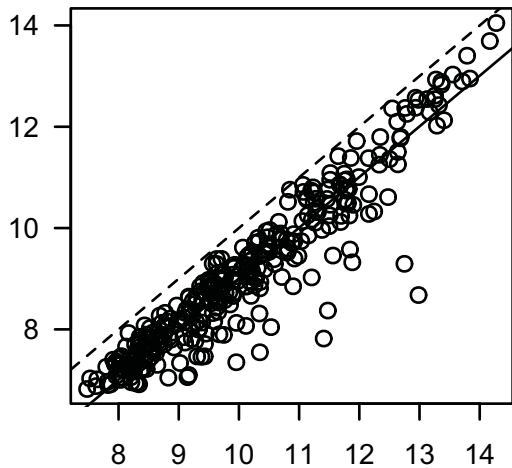 $IFN-\lambda_1$ 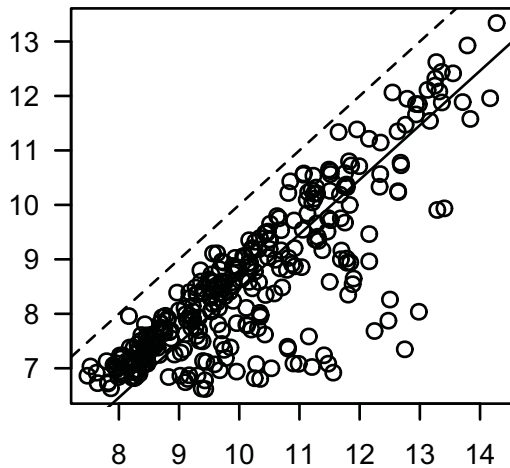 $IFN-\lambda_2$ 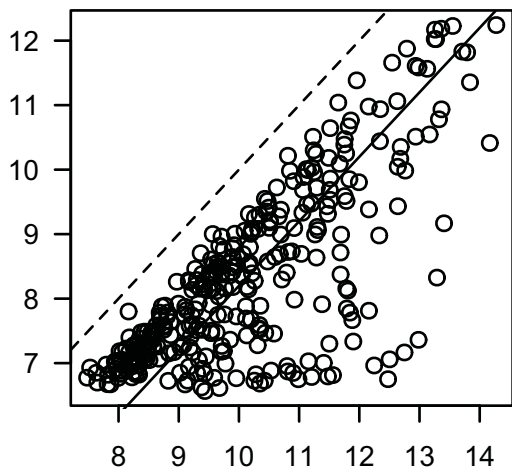 $IFN-\lambda_3$ 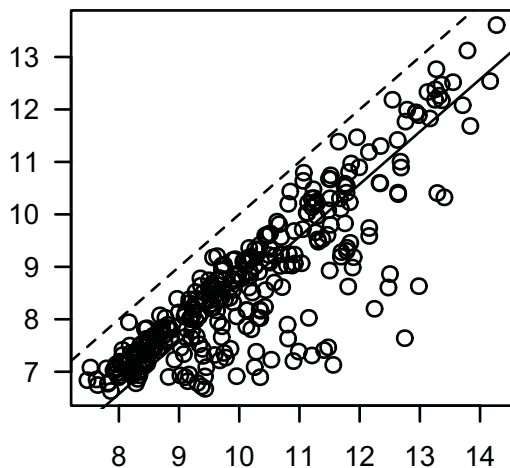 $IFN-\beta$

**A****MX1**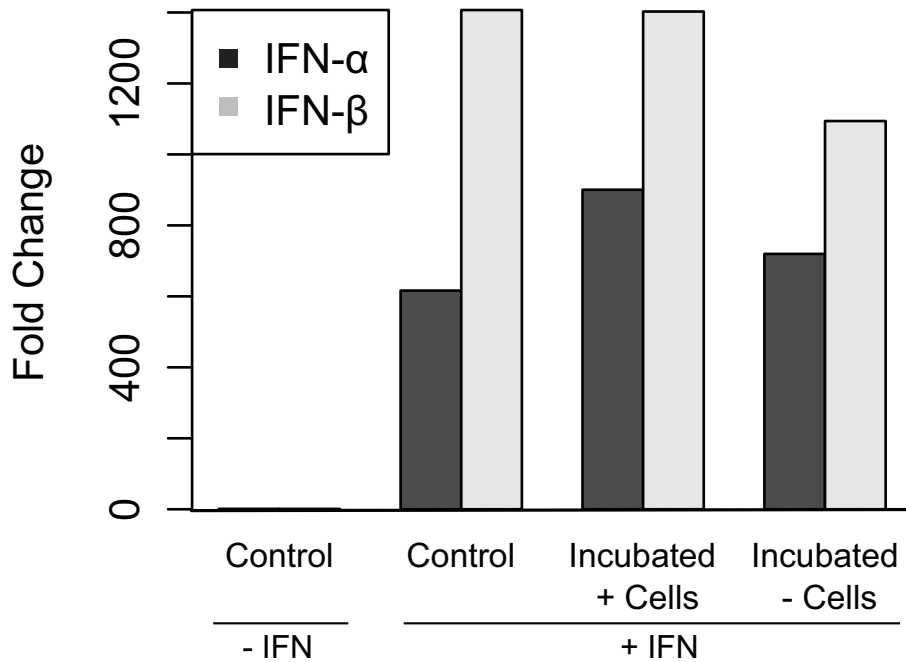**B****IRF9**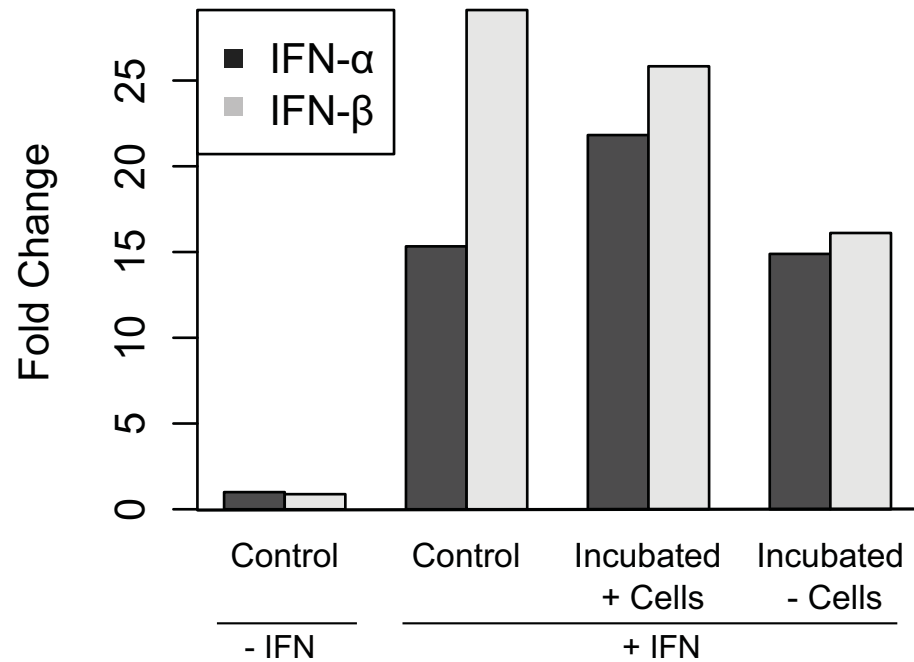

**A**IFN- $\alpha$ 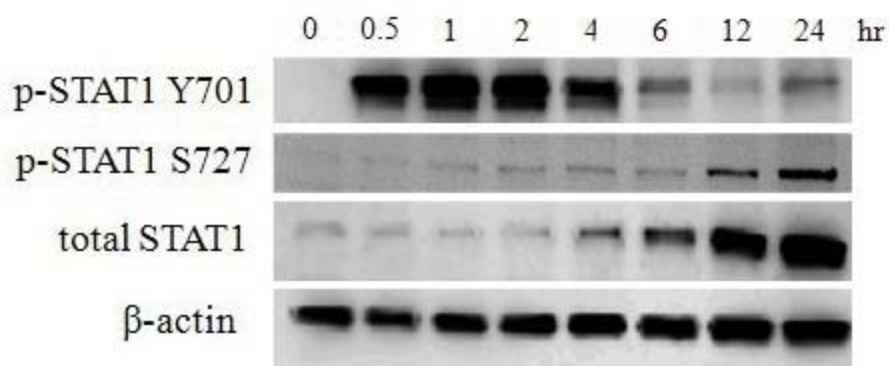IFN- $\beta$ 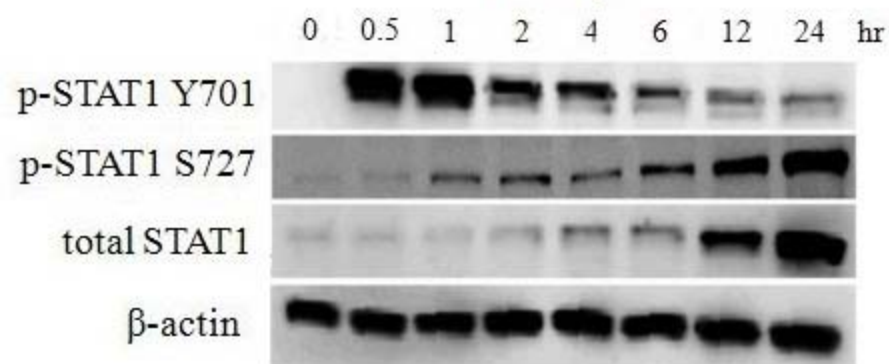**B**IFN- $\lambda$ 1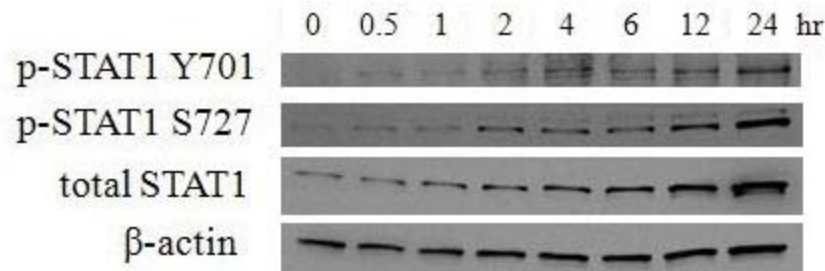IFN- $\lambda$ 2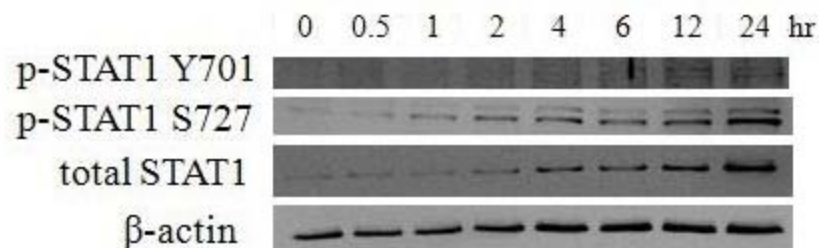IFN- $\lambda$ 3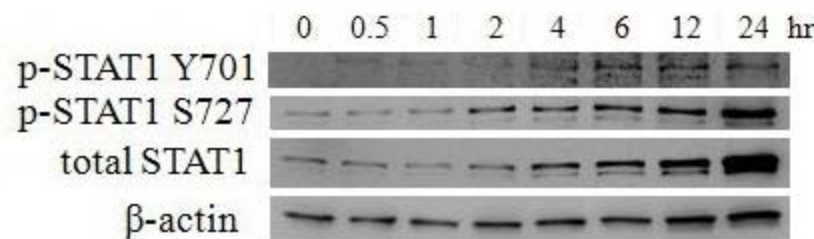

MX1

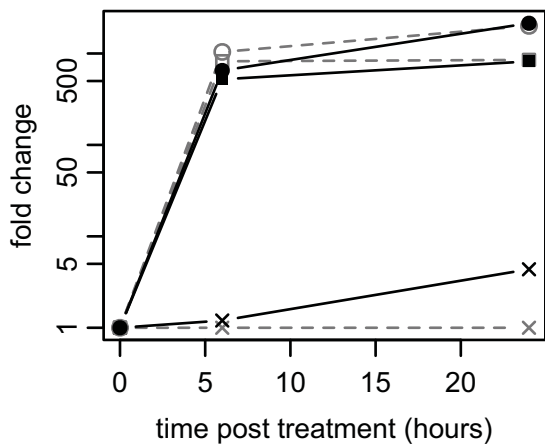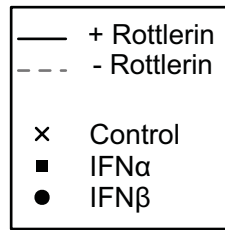

IRF9

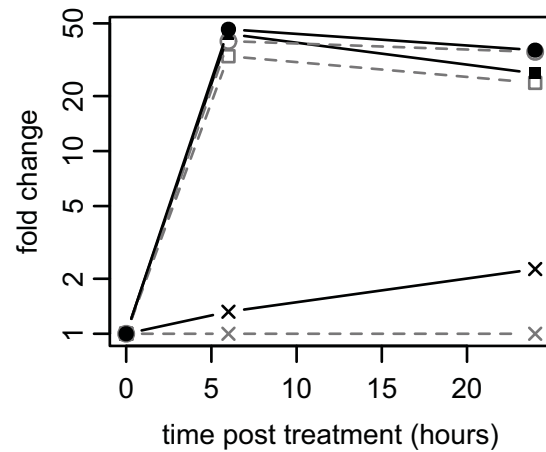

IFIT3

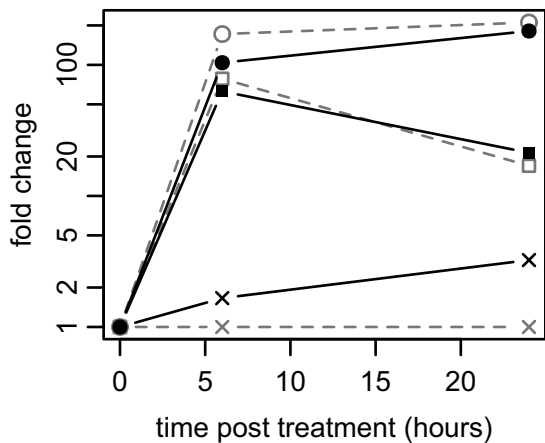

CXCL10

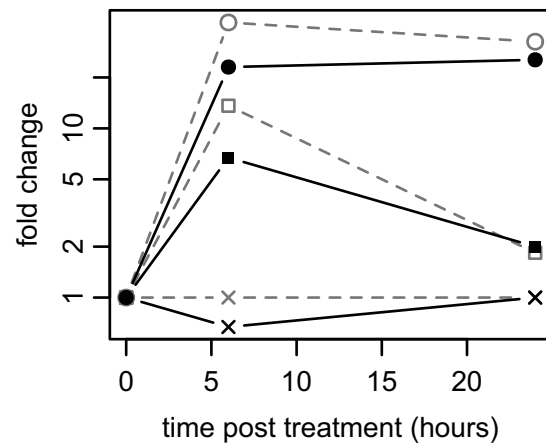

RSAD2

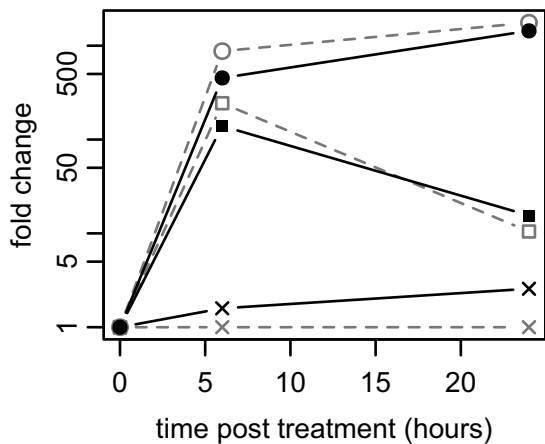

TNFSF10

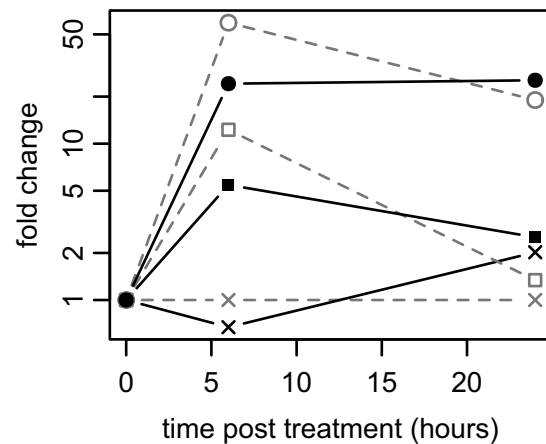

Supplement: NIHMS510811-supplement-Supp_Fig_S1-S4.pdf [file NIHMS510811-supplement-Supp_Fig_S1-S4.pdf]
